# Supplementary material for: Integration of Provider, Pharmacy, and Patient-Reported Data to Improve Medication Adherence for Type 2 Diabetes: A Controlled Before-After Pilot Study
Source: PubMed Central journal article supplement (PMC4763113; doi:10.2196/medinform.4739), 2016-02-08
Supplement: medinform_v4i1e4_app1.pdf [file medinform_v4i1e4_app1.pdf]

[Discard changes](#) | [Print](#)

## test patienta | Medication Barriers Form (Unsaved Form)

[Save Changes](#)

1. I just forget to take them.  Never  Rarely  Sometimes  Often  Very Often\*
2. I forgot to fill my prescription in time.  Never  Rarely  Sometimes  Often  Very Often\*
3. I don't know what does to take.  Never  Rarely  Sometimes  Often  Very Often\*
4. I'm not sure exactly what each medicine is for.  Never  Rarely  Sometimes  Often  Very Often\*
5. There are too many doses to take each day.  Never  Rarely  Sometimes  Often  Very Often\*
6. It's too hard to keep track of what I am supposed to take when.  Never  Rarely  Sometimes  Often  Very Often\*
7. They are unpleasant to take.  Never  Rarely  Sometimes  Often  Very Often\*
8. I can't afford them.  Never  Rarely  Sometimes  Often  Very Often\*
9. My medicines make me feel bad or have side effects I don't like.  Never  Rarely  Sometimes  Often  Very Often\*
10. I have heard about side effects that I am afraid I might get.  Never  Rarely  Sometimes  Often  Very Often\*
11. Getting to the pharmacy to pick them up is difficult.  Never  Rarely  Sometimes  Often  Very Often\*
12. The pharmacy could not fill my prescription.  Never  Rarely  Sometimes  Often  Very Often\*
13. My doctor or nurse forgot to write a new prescription.  Never  Rarely  Sometimes  Often  Very Often\*
14. I ran out of medication before I could call or visit my doctor or nurse.  Never  Rarely  Sometimes  Often  Very Often\*
15. I don't have enough time to talk with my doctor or nurse about problems I am having with my medicines.  Never  Rarely  Sometimes  Often  Very Often\*
16. I sometimes forget to ask my doctor or nurse about problems that I am having with my medicines.  Never  Rarely  Sometimes  Often  Very Often\*
17. I don't feel my medicines are helping me.  Never  Rarely  Sometimes  Often  Very Often\*
18. I just don't like taking medicine in general.  Never  Rarely  Sometimes  Often  Very Often\*
19. Taking medicines makes my health worse.  Never  Rarely  Sometimes  Often  Very Often\*
20. I sometimes find it hard to ask my doctor or nurse questions about my medications.  Never  Rarely  Sometimes  Often  Very Often\*

[Enter Form](#)
